# Supplementary material for: Amphiphilic copolymer self-assembly of magnetic nanoparticles for construction of magnetically responsive photonic crystals based on steric hindrance
Source: Royal Society of Chemistry journal article supplement (doi:10.1039/c9ra08962d), 2019-01-01
Supplement: c9ra08962d1.pdf [file c9ra08962d1.pdf]

Supporting Information for

## **Amphiphilic Copolymer Self-assembly of Magnetic Nanoparticles for Construction of Magnetically Responsive Photonic Crystals Based on Steric Hindrance**

Meng Shang, Xinjiong Ni, Jiasheng Xu, Yuhua Cao\*

School of Chemical and Material Engineering, Jiangnan University, Wuxi, 214122, People's Republic of China

\*E-mail: yuhua cao64@gmail.com.

## 1. FTIR Characterization:

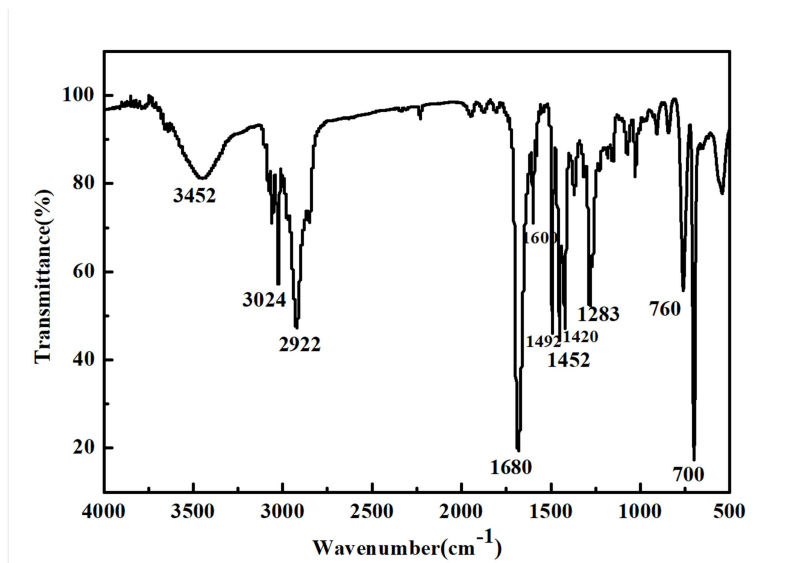

Figure S1. FTIR spectrum of the P(St-co-VP) (1:9).

From the FTIR spectrum, we can see the obvious characteristic absorption peaks of PS and PVP. Among them, the absorption peaks at 1600 cm<sup>-1</sup> and 1492 cm<sup>-1</sup> is the vibration characteristic absorption peaks of the benzene ring framework. The absorption peaks at 760 cm<sup>-1</sup> and 700 cm<sup>-1</sup> are the C-H out-of-plane bending vibration of monosubstitute benzene. The absorption peak at 1680 cm<sup>-1</sup> is the stretching vibration absorption peak of C=O on pyrrole ring. The absorption peak at 1283 cm<sup>-1</sup> is the characteristic absorption peak of the C-N bond in pyrrole ring. Therefore, the product is a copolymer containing St and N-VP.

## 2. GPC Characterization:

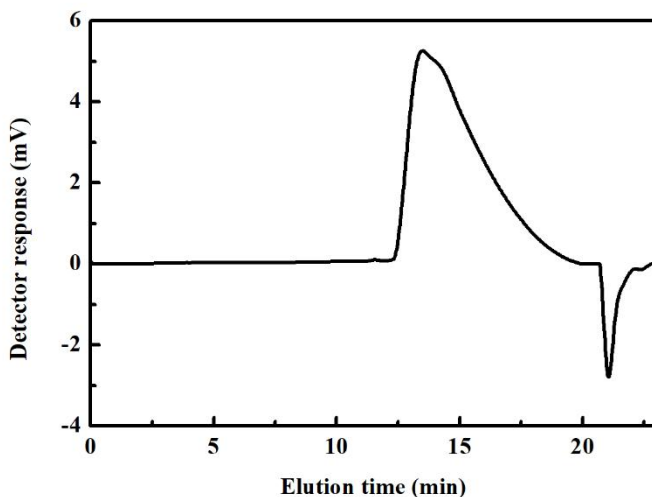

Figure S2 GPC of the P(St-co-VP).

Condition: chromatographic column: styragel@HR4 DMF (7.8×300 mm); column temperature: 35 °C ; detector: differential refractive index detector; mobile phase: DMF (spectrographic grade); volume flow rate: 1.0 mL/min; sample concentration: 10.0 mg/mL.

Table 1 The molecular weight and distribution of P(St-co-VP).

| P(St-co-VP) | $M_n \times 10^4$ (Daltons) | $M_w \times 10^4$ (Daltons) | $M_z \times 10^4$ (Daltons) | Polydispersity |
|-------------|-----------------------------|-----------------------------|-----------------------------|----------------|
|             | 10.08                       | 14.29                       | 18.73                       | 1.42           |

According to calibration curve using polystyrene (PS) as the standards, the number-average molecular weight ( $M_n$ ) was 100800, the weight-average molecular weight ( $M_w$ ) was 142900, and the polydispersity ( $M_w/M_n$ ) of the copolymer was 1.42.

### 3. $^1\text{H}$ NMR Characterization:

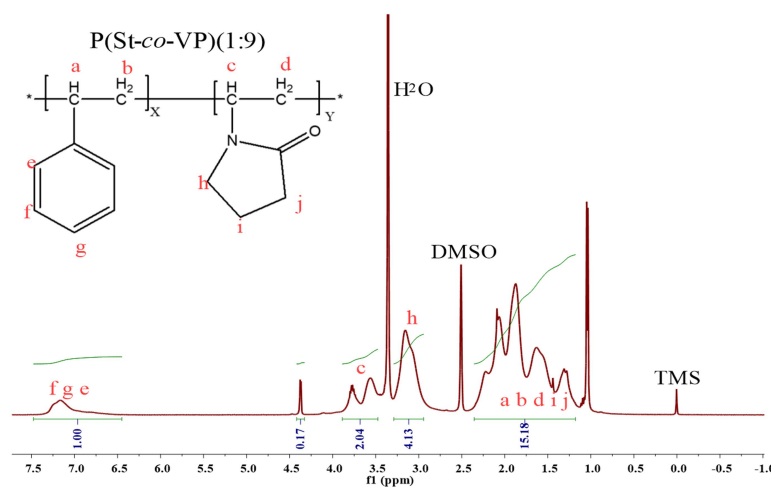

Figure S3.  $^1\text{H}$  NMR spectroscopy of the P(St-co-VP).

The deuterated dimethyl sulfoxide ( $\text{DMSO-d}_6$ ) was used as a solvent and tetramethylsilane (TMS) as an internal standard, and the measurement was carried out using  $^1\text{H}$  NMR apparatus at 500 MHz at room temperature. From the  $^1\text{H}$  NMR spectrum, the chemical shift of protons ( $\delta$ ) could be determined by comparing the molecular formula of the copolymer. Where, 7.1 ppm was the absorption peak (e, f, g) of protons on the mono-substituted benzene. The absorption peak (h) of methylene protons connected to N in pyrrole ring was at 3.15 ppm. Therefore, according to the integral area of characteristic proton absorption peak, the molar ratio of St and N-VP could be calculated as 1:10. The calculated result was very close to the actual feed ratio of 1:9.
